# Supplementary material for: Fluoride-assisted detection of glutathione by surface Ce3+/Ce4+ engineered nanoceria
Source: Royal Society of Chemistry journal article supplement (doi:10.1039/d2tb01135b), 2022-01-01
Supplement: d2tb01135b1.pdf [file d2tb01135b1.pdf]

**Fluoride-assisted detection of glutathione by surface Ce<sup>3+</sup>/Ce<sup>4+</sup> engineered nanoceria**

Vaishwik Patel<sup>1</sup>, Linta Jose<sup>1</sup>, Gilles Philippot<sup>2</sup>, Cyril Aymonier<sup>2</sup>, Talgat Inerbaev<sup>3,4</sup>, Luke R. McCourt<sup>5</sup>, Michael G. Ruppert<sup>5</sup>, Dongchen Qi<sup>6</sup>, Wei Li<sup>6</sup>, Jiangtao Qu<sup>7</sup>, Rongkun Zheng<sup>7</sup>, Julie Cairney<sup>7</sup>, Jiabao Yi<sup>1</sup>, Ajayan Vinu<sup>1\*</sup>, Ajay S. Karakoti<sup>1\*</sup>

<sup>1</sup>Global Innovative Center for Advanced Nanomaterials (GICAN), School of Engineering College of Engineering, Science and Environment, The University of Newcastle, Callaghan, NSW, 2308, Australia

<sup>2</sup>Univ. Bordeaux, CNRS, Bordeaux INP, ICMCB, UMR 5026, F-33600 Pessac, France

<sup>3</sup>L. N. Gumilyov Eurasian National University, Nur-Sultan 010008, Kazakhstan

<sup>4</sup>Sobolev Institute of Geology and Mineralogy SB RAS, Novosibirsk 630090, Russia

<sup>5</sup>School of Engineering, College of Engineering, Science and Environment, The University of Newcastle, Callaghan, 2308, Australia

<sup>6</sup>Centre for Materials Science, School of Chemistry and Physics, Queensland University of Technology, Brisbane, QLD 4001, Australia

<sup>7</sup>School of Physics, The University of Sydney, NSW, 2000, Australia

\* Corresponding author. Global Innovative Center for Advanced Nanomaterials (GICAN), School of Engineering, College of Engineering, Science and Environment, The University of Newcastle, Callaghan, NSW, 2308, Australia

Email address: [ajayan.vinu@newcastle.edu.au](mailto:ajayan.vinu@newcastle.edu.au), [ajay.karakoti@newcastle.edu.au](mailto:ajay.karakoti@newcastle.edu.au)

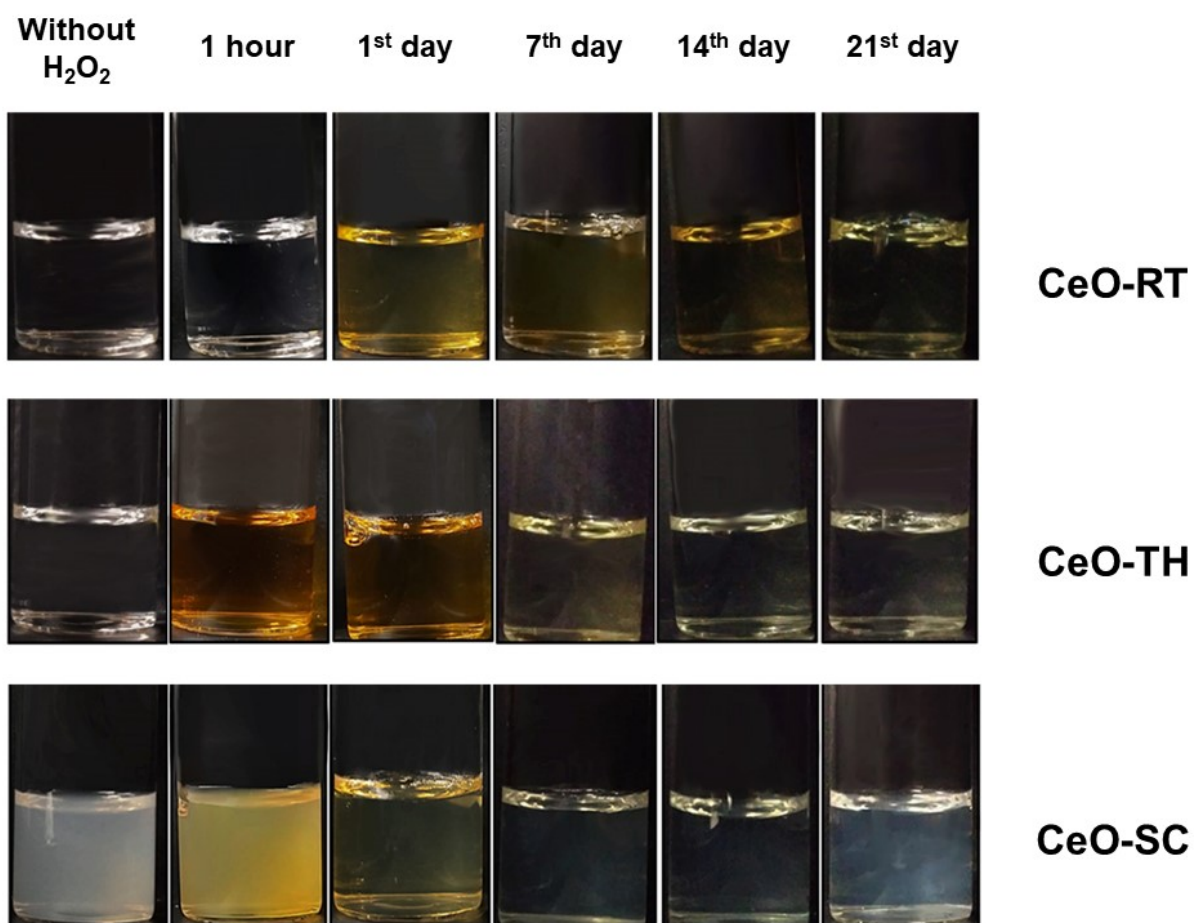

**ESI 1:** Change in the colour (representative of oxidation states) of nanoceria synthesised via different routes after a treatment with  $\text{H}_2\text{O}_2$  and monitored for 21 days

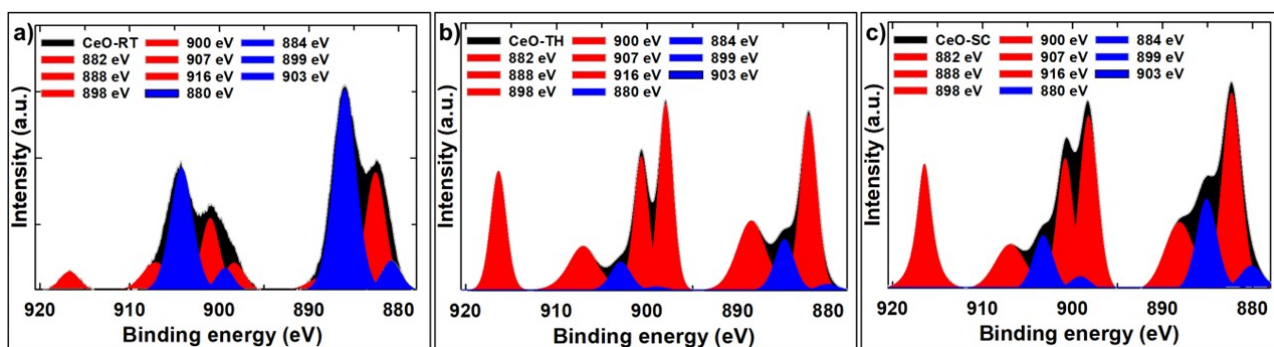

ESI 2: Deconvoluted XPS spectrum of as synthesized a) CeO-RT, b) CeO-TH, and c) CeO-SC

| Peak                       | state            | peak position | CeO-RT |        | CeO-TH |        | CeO-SI |        | CeO-TH-T |        | CeO-SI-T |        |
|----------------------------|------------------|---------------|--------|--------|--------|--------|--------|--------|----------|--------|----------|--------|
|                            |                  |               | FWHM   | Peak % | FWHM   | Peak % | FWHM   | Peak % | FWHM     | Peak % | FWHM     | Peak % |
| v                          | Ce <sup>4+</sup> | 882           | 2.6    | 15.61  | 2.2    | 20.44  | 2.5    | 20.24  | 2.3      | 21.54  | 2.5      | 20.17  |
| v''                        | Ce <sup>4+</sup> | 888           | 5.6    | 0.28   | 3.7    | 13.55  | 3.9    | 11.03  | 3.8      | 13.22  | 4.1      | 11.68  |
| v'''                       | Ce <sup>4+</sup> | 898           | 2.6    | 4.15   | 1.9    | 18.75  | 2.4    | 17.33  | 1.9      | 18.61  | 2.4      | 17.3   |
| u                          | Ce <sup>4+</sup> | 901           | 2.1    | 7.49   | 1.93   | 13.65  | 2.1    | 11.86  | 2.0      | 12.88  | 2.4      | 12.46  |
| u''                        | Ce <sup>4+</sup> | 907           | 3.1    | 3.43   | 3.8    | 8.91   | 4.0    | 7.47   | 3.8      | 8.95   | 4.0      | 7.91   |
| u'''                       | Ce <sup>4+</sup> | 916           | 2.5    | 2.65   | 2.0    | 12.7   | 2.0    | 11.74  | 2.0      | 12.8   | 2.1      | 11.72  |
| v <sup>0</sup>             | Ce <sup>3+</sup> | 880           | 2.5    | 3.42   | 2.5    | 0.83   | 2.9    | 2.65   | 2.7      | 1.32   | 2.5      | 2.69   |
| v'                         | Ce <sup>3+</sup> | 884           | 3.4    | 37.44  | 2.5    | 6.75   | 2.7    | 10.16  | 2.5      | 6.06   | 2.4      | 8.85   |
| u <sup>0</sup>             | Ce <sup>3+</sup> | 899           | 2.2    | 2.99   | 2.7    | 0.51   | 2.8    | 1.64   | 2.9      | 0.81   | 2.5      | 1.66   |
| u'                         | Ce <sup>3+</sup> | 903           | 3.4    | 22.55  | 2.6    | 3.9    | 2.6    | 5.87   | 2.4      | 3.81   | 2.7      | 5.56   |
| Total Ce <sup>4+</sup> (%) |                  |               | 33.61  |        | 88.00  |        | 79.67  |        | 88.00    |        | 81.24    |        |

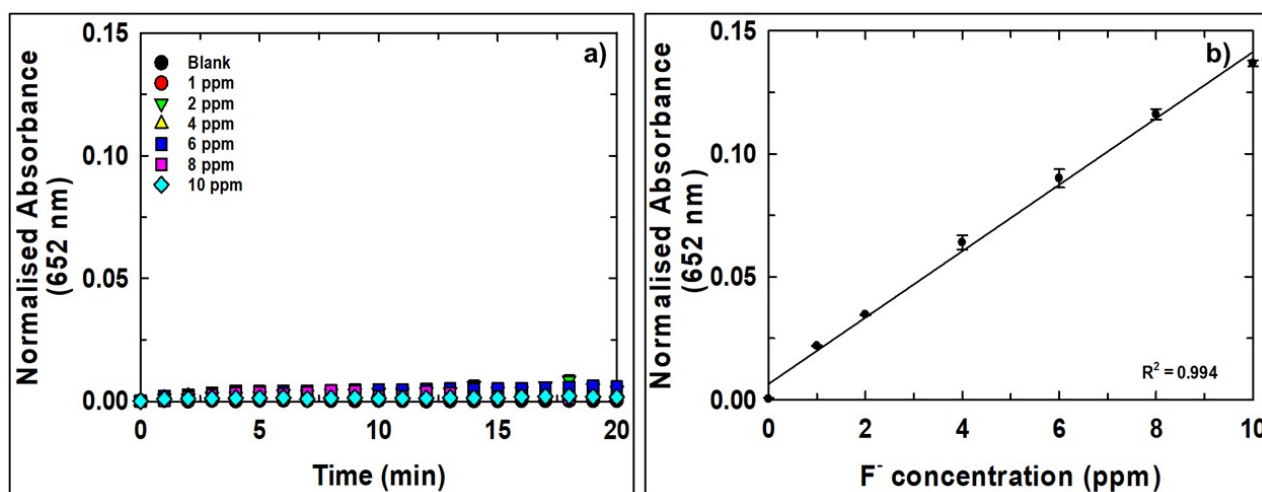

**ESI 4:** a) Effect of fluoride ion on oxidation of TMB, b) Linear range of detection of fluoride ions within 1-10 ppm by CeO-SC



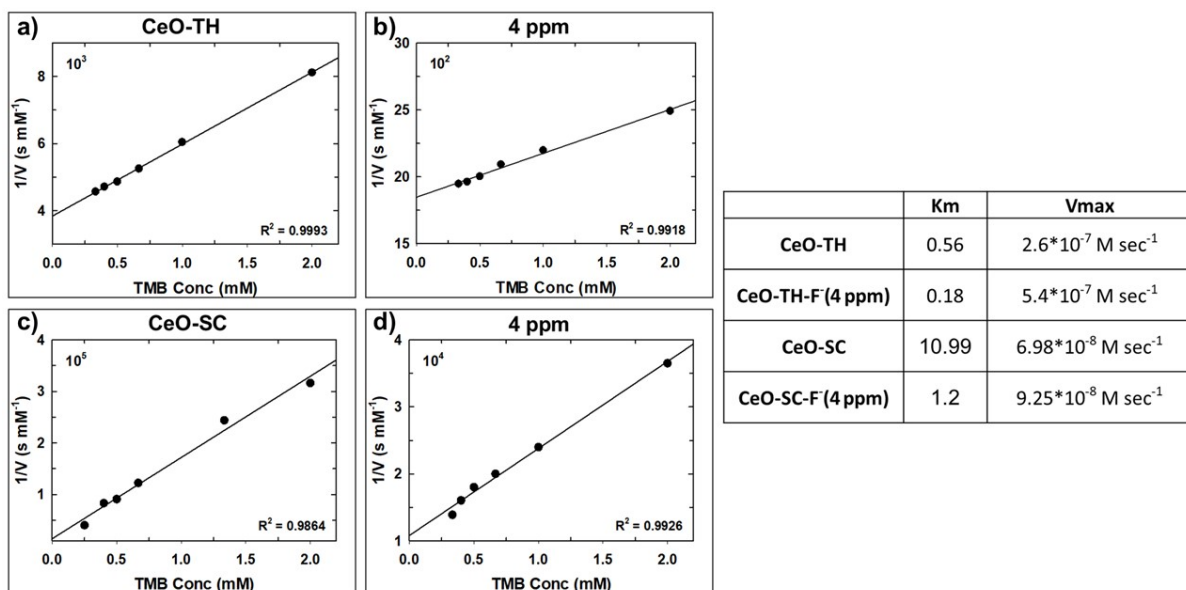

**ESI 5:** Enzyme kinetics representation for TMB through Lineweaver-Burk plot of a) CeO-TH, b) CeO-TH-F<sup>-</sup> (4 ppm), c) CeO-SC, d) CeO-SC-F<sup>-</sup> (4 ppm).

**ESI 6:** Zetapotential of fluoride treated and untreated CeO-RH, CeO-TH and CeO-SC nanoparticles

| Samples  | AVG (mV) | STD |
|----------|----------|-----|
| CeO-RT   | +44.2    | 0.9 |
| CeO-RT-F | +42.0    | 1.1 |
| CeO-TH   | +43.0    | 1.6 |
| CeO-TH-F | +42.0    | 0.6 |
| CeO-SC   | +42.8    | 0.3 |
| CeO-SC-F | +38.0    | 1.3 |

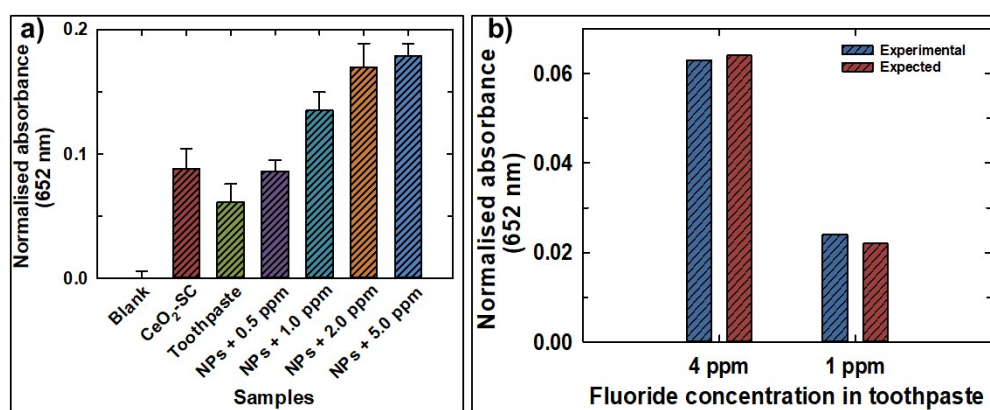

**ESI 7:** a) Fluoride detection with spiking of known concentration in toothpaste solution and b) Comparison of data obtained from toothpaste solution (without spiking).
